# Supplementary material for: Quantification of amine functional groups on silica nanoparticles: a multi-method approach
Source: Royal Society of Chemistry journal article supplement (doi:10.1039/c9na00016j), 2019-01-01
Supplement: c9na00016j1.pdf [file c9na00016j1.pdf]

## Supplementary Information

### Quantification of Amine Functional Groups on Silica Nanoparticles: A Multi-Method Approach

Ying Sun, Filip Kunc, Vinod Balhara, Brian Coleman, Oltion Kodra, Mohammad Raza, Maohui Chen, Andreas Brinkmann, Gregory P. Lopinski, Linda J. Johnston\*

#### INDEX

Table S1. Characterization data for silica NPs

Table S2. Redispersion of silica NPs for colorimetric assays

Table S3, S4. Additional data for ninhydrin assay

Figures S1, S2. Optimization of ninhydrin assay

Figures S3, S4. Calibration of ninhydrin assay

Estimation of detection limits

Figure S5.  $^1\text{H}$  NMR spectrum

Figure S6. AFM images of XPS samples

Figure S7. Survey XPS spectra

Figure S8. Time dependence of N1s signal

\*Corresponding author; Email: [Linda.Johnston@nrc-cnrc.gc.ca](mailto:Linda.Johnston@nrc-cnrc.gc.ca)

**Table S1** Characterization of silica NPs provided by the manufacturer or measured at NRC (BET only).

| SiO <sub>2</sub> @C <sub>3</sub> NH <sub>2</sub> | Diameter (nm)<br>[TEM] <sup>a</sup> | Hydrodynamic<br>Diameter (nm)<br>[DLS] | Zeta<br>Potential<br>(mV) <sup>b</sup> | Estimated<br>Surface<br>Area<br>(m <sup>2</sup> /g) <sup>c</sup> | BET<br>Specific<br>Surface<br>Area<br>(m <sup>2</sup> /g) <sup>d</sup> |
|--------------------------------------------------|-------------------------------------|----------------------------------------|----------------------------------------|------------------------------------------------------------------|------------------------------------------------------------------------|
| B1 50 nm                                         | 47 ± 3                              | 88                                     | + 34                                   |                                                                  |                                                                        |
| B1 80 nm                                         | 79.7 ± 5.9                          | 108.7                                  | + 43.4                                 |                                                                  |                                                                        |
| B1 100 nm                                        | 97 ± 6                              | 144                                    | + 64                                   |                                                                  |                                                                        |
| B2 20 nm                                         | 22.6 ± 2.7                          | 64                                     | + 20.5                                 | 135                                                              |                                                                        |
| B2 50 nm                                         | 48 ± 3                              | 83                                     | + 33.9                                 | 63.8                                                             | 80                                                                     |
| B2 80 nm                                         | 79.7 ± 5.9                          | 108.7                                  | + 43.4                                 | 38.4                                                             | 33                                                                     |
| B2 100 nm                                        | 97 ± 6                              | 144                                    | + 64                                   | 31.6                                                             |                                                                        |
| B2 120 nm                                        | 118 ± 8                             | 145.1                                  | + 44.7                                 | 25.9                                                             | 36                                                                     |
| B3 50 nm                                         | 48 ± 3                              | 83                                     | + 33.9                                 |                                                                  |                                                                        |
| B3 80 nm, dry                                    | 80 ± 6                              | -                                      | -                                      |                                                                  |                                                                        |
| B3 100 nm, dry                                   | 97 ± 6                              | -                                      | -                                      |                                                                  |                                                                        |

<sup>a</sup> Average TEM diameter, with standard deviation as a measure of the breadth of the particle size distribution.

<sup>b</sup> Most values were measured in 2 mM acetate in ethanol; exceptions are B2, 120 nm and B1, 80 nm measured in ethanol and B2, 80 nm measured in water.

<sup>c</sup> Surface area was estimated from the average TEM diameter and a silica density of 1.96 g/cm<sup>3</sup>, using the following approach, with r = radius.

Surface area (m<sup>2</sup>/g) = (# particles/g) × (surface area/particle) where

$$\text{surface area/particle} = 4\pi r^2$$

$$\#\text{particles/g} = 1/(\text{mass/particle}) = 1/(\text{volume/particle} \times \text{density}) = 1/(4/3(\pi r^3) \times \text{density})$$

<sup>d</sup> BET specific surface area measured by adsorption of nitrogen with a gas sorption analyzer Nova 2200e (Quantachrom). Prior to analysis samples were degassed under vacuum at 115 °C for 16 hours. 7-point nitrogen sorption isotherms were measured at -196 °C and the specific surface area was calculated by the multipoint BET method.

**Table S2** Redispersion of NPs for colorimetric assays. A suspension of 100 nm NPs (nominal diameter) was measured by dynamic light scattering before and after solvent exchange and redispersion.

| Sample                                                           | Z-average, nm | PdI   |
|------------------------------------------------------------------|---------------|-------|
| NPs, as received in ethanol                                      | 158           | 0.078 |
| NPs, manufacturer data sheet                                     | 152.5         | -     |
| NPs, after solvent exchange to 60% ethanol + redispersion (NP-R) | 140           | 0.019 |
| NP-R, 15 min bath sonication                                     | 136           | 0.026 |
| NP-R, 30 min bath sonication                                     | 137           | 0.016 |

**Table S3** Determination of amine content for silica NPs using the ninhydrin colorimetric assay.

| Experiment <sup>a</sup> | Amine content, $\mu\text{mol/g}$ |                                |                             |
|-------------------------|----------------------------------|--------------------------------|-----------------------------|
|                         | 120 nm, NH <sub>2</sub>          | 50 nm, NH <sub>2</sub>         | 100 nm, bare                |
| 1A                      | 275                              | 494                            | 1                           |
| 1B                      | 305                              | 525                            | 1                           |
| 1C                      | 265                              | 442                            | 2                           |
| 1D                      | 267                              | 480                            | 1                           |
| <b>1 Average</b>        | <b>278 <math>\pm</math> 16</b>   | <b>485 <math>\pm</math> 30</b> | <b>1 <math>\pm</math> 1</b> |
| 2A                      | 258                              | 472                            | 0                           |
| 2B                      | 271                              | 446                            |                             |
| 2C                      | 338                              | 461                            |                             |
| 2D                      | 262                              | 444                            |                             |
| <b>2 Average</b>        | <b>282 <math>\pm</math> 34</b>   | <b>456 <math>\pm</math> 12</b> | <b>0</b>                    |
| 3A                      | 271                              | 441                            |                             |
| 3B                      | 277                              | 435                            |                             |
| 3C                      | 278                              | 464                            |                             |
| 3D                      | 270                              | 437                            |                             |
| <b>3 Average</b>        | <b>274 <math>\pm</math> 4</b>    | <b>444 <math>\pm</math> 12</b> |                             |
| <b>Average</b>          | <b>278 <math>\pm</math> 23</b>   | <b>458 <math>\pm</math> 27</b> | <b>1</b>                    |

<sup>a</sup> Experiments 1A-1D are 4 replicates done in parallel on the same day. Experiments 2A-2D and 3A-3D are replicates from two different days.

**Table S4** Determination of amine content for silica NPs measured using the ninhydrin colorimetric assay.

| Aminated silica            | Amine, $\mu\text{mol/g}$ |
|----------------------------|--------------------------|
| 50 nm, Batch A, suspension | 447 $\pm$ 15             |
| 50 nm Batch B, suspension  | 76 $\pm$ 4               |
| 50 nm Batch C, suspension  | 63 $\pm$ 2               |
| 80 nm, Batch A, dry        | 75 $\pm$ 7               |
| 80 nm, Batch B, dry        | 105 $\pm$ 2              |
| 100 nm, Batch B, dry       | 40 $\pm$ 2               |
| 100 nm, Batch B, dry       | 128 $\pm$ 5              |

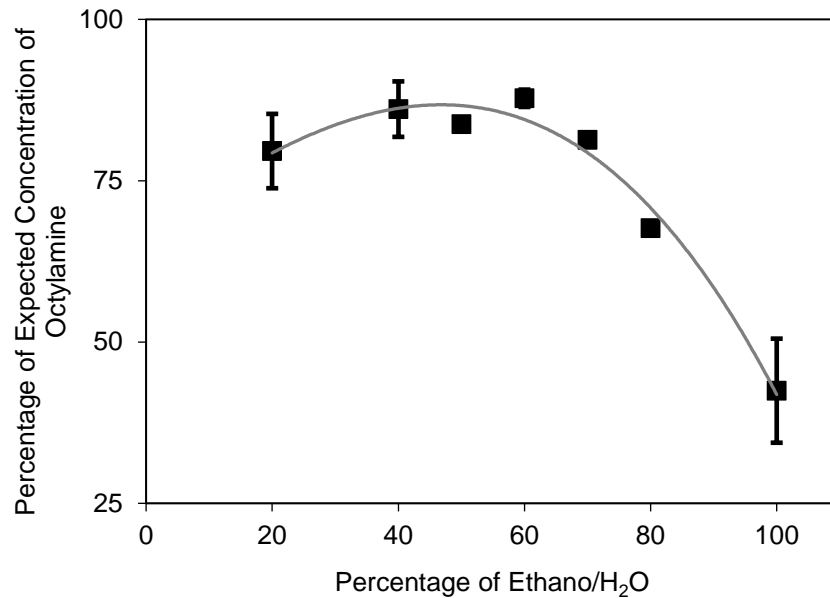

**Fig. S1** Effect of solvent on the ninhydrin reaction for octylamine in aqueous ethanol mixtures; 2, 2, 1, 6, 1, 2 and 6 for 20, 40, 50, 60, 70, 80 and 100% respectively.

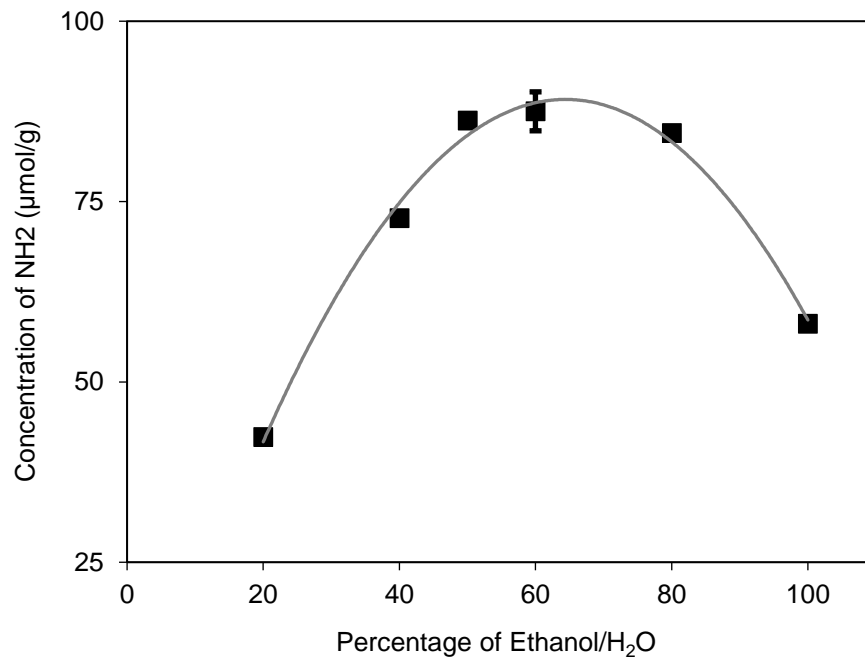

**Fig. S2** Effect of solvent on amine determinations for 50 nm aminated silica NPs measured using the ninhydrin assay in aqueous ethanol mixtures. All points are single determinations except for 60% aq ethanol, n = 3.

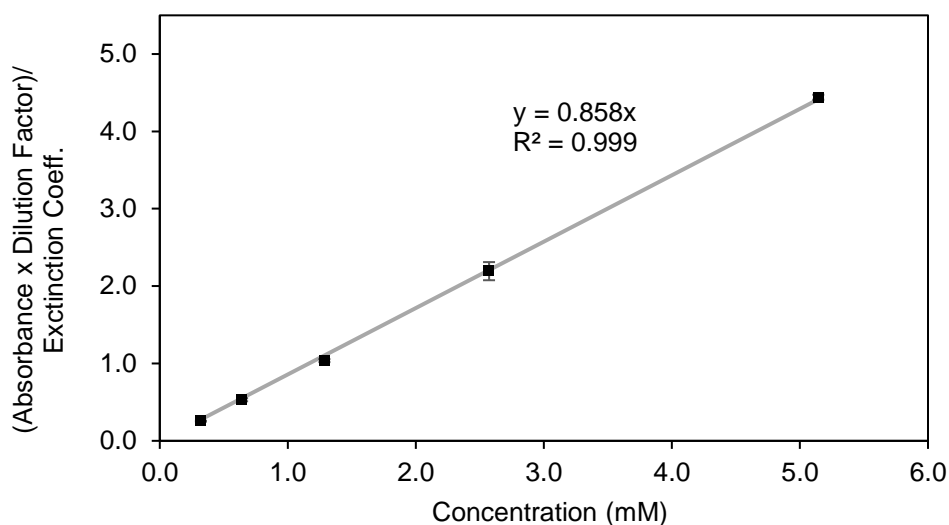

**Fig. S3** Ninhydrin calibration curve performed with octylamine in 60 % ethanol/H<sub>2</sub>O. Each data point represents an average of 4 measurements.

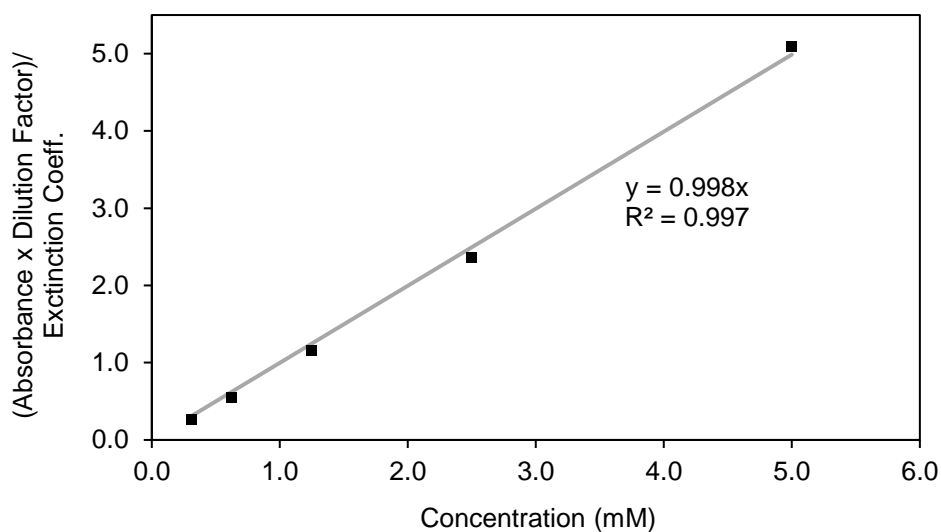

**Fig. S4** Ninhydrin calibration curve performed with amino acid leucine in 60 % ethanol/H<sub>2</sub>O.

**Estimation of detection limits for colorimetric assays.** Detection limits were estimated by assuming that an absorbance value of 0.1 (1 cm path length) was required to quantify amine using either the ninhydrin or 4-NBA assay. For the 5 mg (dry mass) silica samples used here, this corresponds to quantification limits of 0.8 and 1.2  $\mu\text{mol}$  amine/g silica.

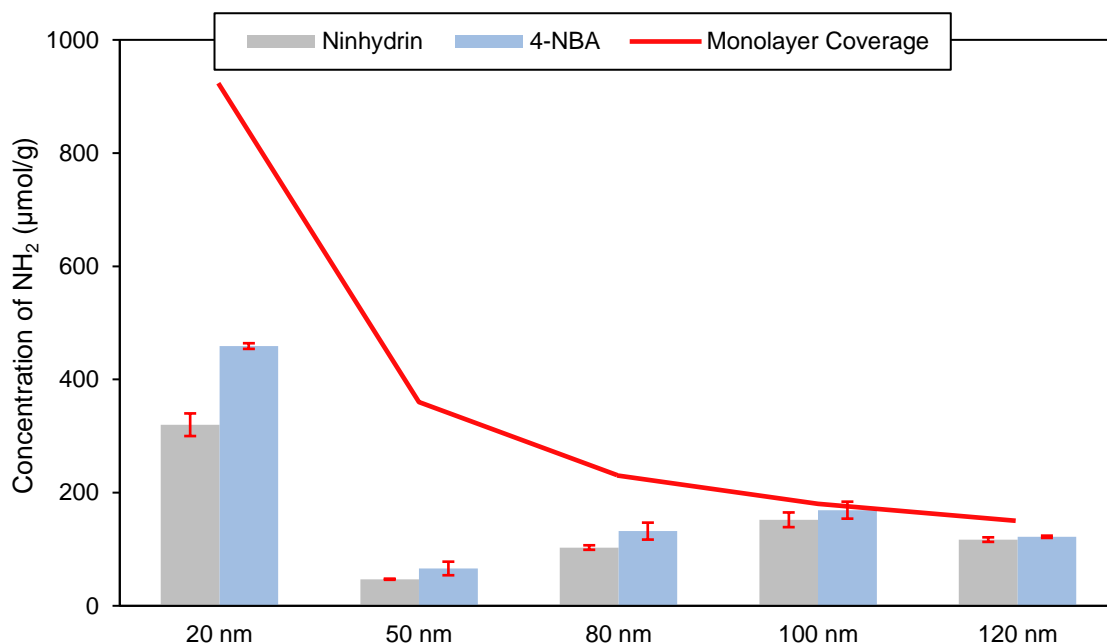

**Fig. S5** Comparison of ninhydrin and 4-nitrobenzaldehyde colorimetric assays for a single batch (B2) of commercial silica nanoparticles. Monolayer coverage is shown assuming 4 aminopropyl siloxane/nm<sup>2</sup>. Data taken from Table 1.

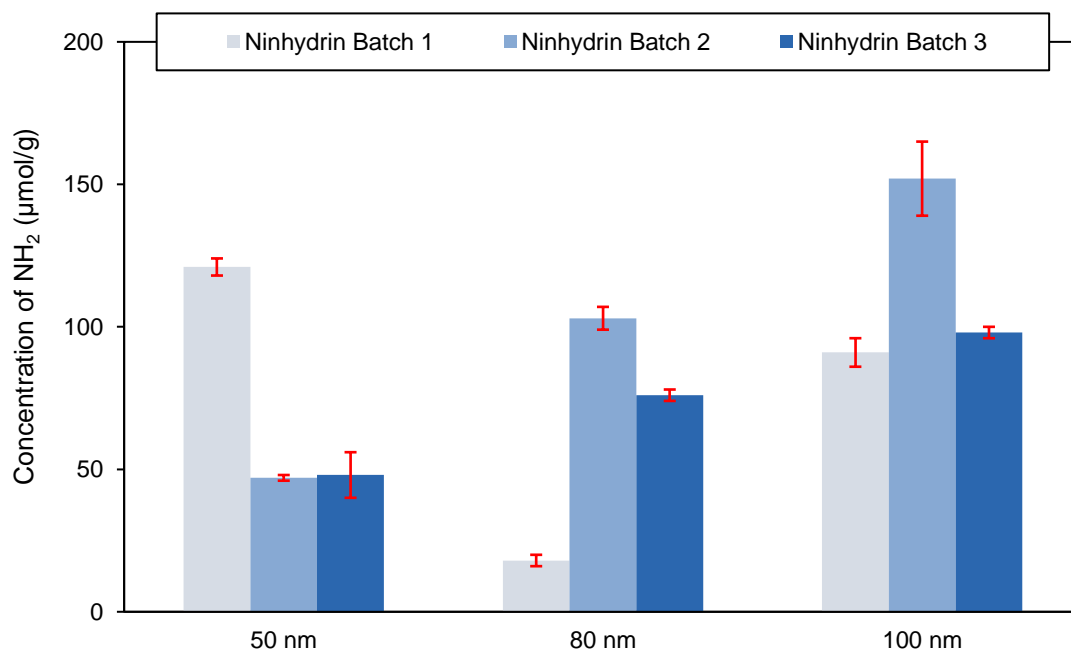

**Fig. S6** Variability of surface amine content between commercial batches of functionalized silica nanoparticles, as determined by the ninhydrin assay. Data taken from Table 1.

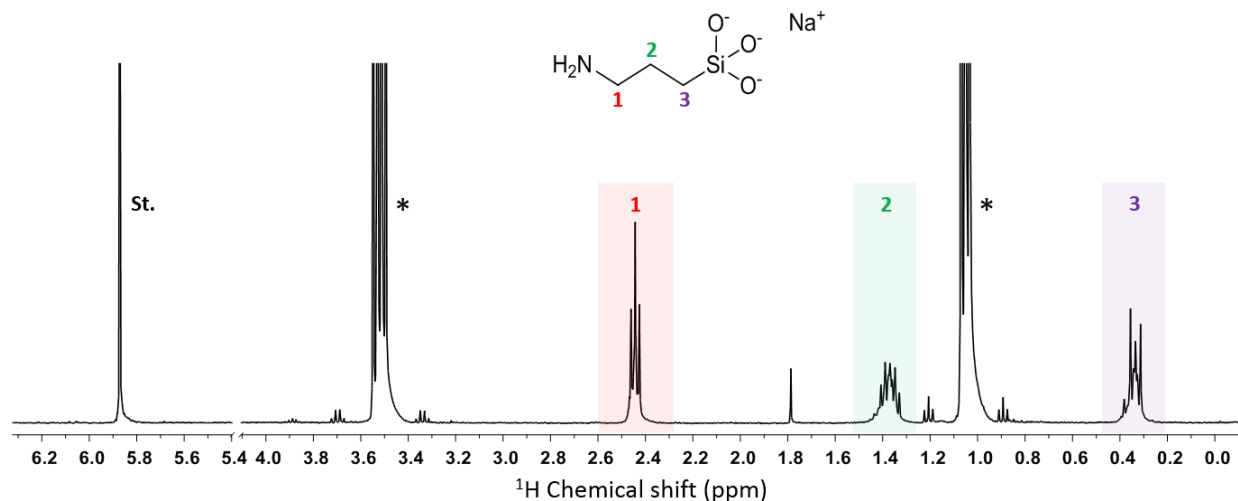

**Fig. S7** <sup>1</sup>H NMR spectrum of 100 nm aminated silica NPs (B3) hydrolyzed in 0.4 M NaOD at 45 °C for 3 hours. The 3-aminopropyl siloxane group was quantified by comparison to maleic acid added as an internal standard (denoted as ‘St.’). The water region (5.4 ppm - 4.1 ppm) was removed for clarity. The residual ethanol signals are marked with an asterisk.

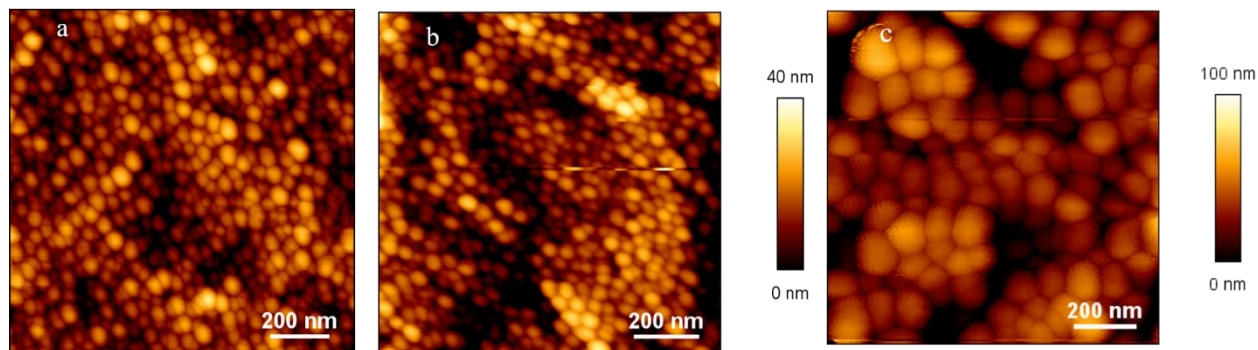

**Fig. S8** AFM images of samples deposited on Au substrates for XPS measurements: 50 nm aminated silica NPs before (a) and after functionalization with BTFBA and 100 nm aminated silica after functionalization with BTFBA (c). Imaging was done on a JPK NanoWizard 2 in tapping mode with HQ:XSC11/Al BS cantilevers (42N/m, Mikromasch).



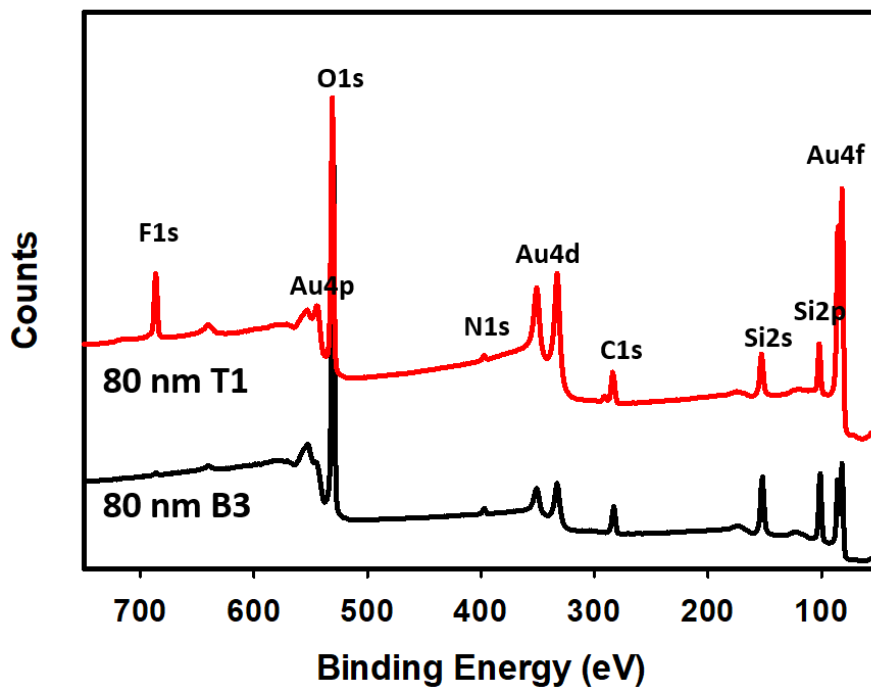

**Fig. S9** XPS survey spectra of aminated silica NPs before (80 nm B3) and after (80 nm T1) labelling with BTFBA.

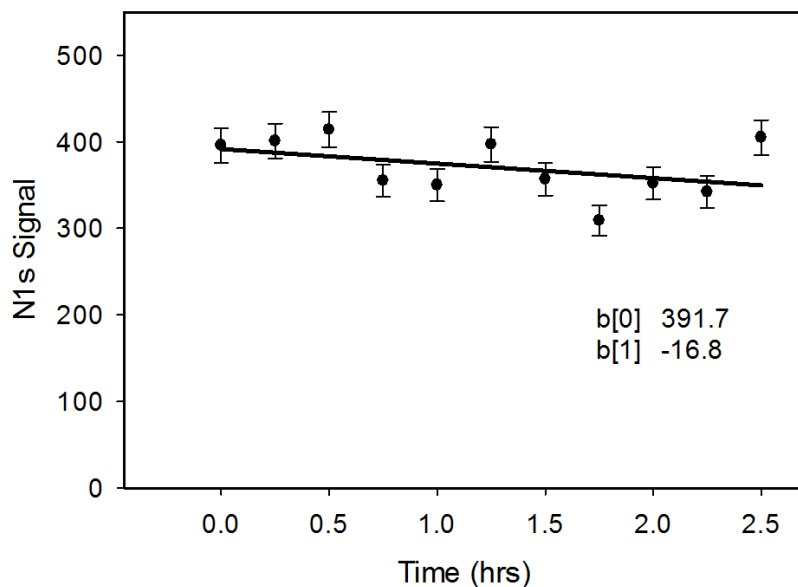

**Fig. S10** Time dependence of N1s signal (integrated peak area after background subtraction as described above) for 50nm aminated silica NPs (B3, T2). The linear fit to the data indicates the signal loss is <10% during a 2.5 hr. scan, the time used for acquiring the data. This implies that the amount of nitrogen on the surface may be underestimated by up to 5%.
